# Supplementary material for: Seasonal pattern of influenza and the association with meteorological factors based on wavelet analysis in Jinan City, Eastern China, 2013–2016
Source: PeerJ. 2020 Mar 9;8:e8626. doi: 10.7717/peerj.8626 (PMC7067199; doi:10.7717/peerj.8626)
Supplement: Supplemental Information 1 [file peerj-08-8626-s001.xlsx]

## Sheet: Sheet1
	pressure	average Temperature	RH	AH	rainfall	wind speed	sunshine	positive rate
201301	1009.63	-5.8	43.2857	1.474	0	2.31429	54.2	57.1429
201302	1005.46	-0.628571	53.7143	2.50756	0	2.45714	28.2	40.8602
201303	1008.41	-1.11429	78.5714	3.56275	4.682	1.92857	26.3	45.3488
201304	1004.29	-0.757143	80.7143	3.73912	0.0112857	2.1	40.2	30.5556
201305	1003.5	1.51429	82	4.34699	0.015	1.64286	22.1	41.2698
201306	1007.83	-2.7	69.1429	2.8489	9.348	2.71429	24.8	27.7778
201307	1004.34	2.18571	67.1429	3.70248	4.67614	2.42857	32.8	12.5
201308	1006.69	4.25714	54.2857	3.37639	0	2.24286	40.8	8.62069
201309	1002.94	4.7	55.1429	3.51826	0.00171429	2.77143	34.1	2.8169
201310	995.129	14.9714	28.7143	3.23509	0	4.34286	61.3	4.7619
201311	1000.33	8.77143	45.8571	3.68428	4.67243	2.9	46.1	1.63934
201312	993.671	7.3	50	3.69899	9.34286	4.04286	48.1	0
201313	998.3	8.78571	44.1429	3.54938	0.00528571	3.42857	38.3	0
201314	994.771	11.7571	46	4.35754	0.003	4.1	45.3	0
201315	995.143	14.1571	25.8571	2.78905	0	3.55714	71.7	0
201316	994.057	11.5429	53.4286	5.00236	0.0111429	2.8	45.5	0
201317	991.671	17.5857	51.4286	6.65235	4.67343	3.18571	61.8	0
201318	995.157	19.6714	38.5714	5.56029	0	2.67143	63.4	0
201319	988.971	21.6571	55	8.7773	0.0307143	3.15714	52.7	0
201320	988.486	22.7571	53.4286	9.01518	4.69043	3.82857	60	0
201321	986.929	25.4571	58.2857	11.2561	0.0388571	3.11429	42.9	0
201322	987.757	21.3429	66.1429	10.388	0.00928571	3.17143	47.8	0
201323	988.371	26.8714	54.4286	11.2701	0.00857143	3.02857	52.2	0
201324	989.114	23.5714	58.5714	10.2964	0.037	3.42857	63.1	0
201325	984.814	24.3857	75.2857	13.785	0.0471429	2.11429	16.7	0
201326	982.743	28.4286	58	12.9575	0	3.74286	71.6	0
201327	979.414	29.3	63.7143	14.847	0.0268571	2.9	53.1	0
201328	984.586	26.6143	85.7143	17.5255	0.193286	2.5	18.1	0
201329	983.543	26.1	80.1429	15.9768	4.79129	2.24286	30.1	0
201330	982.586	27.7429	78.1429	16.8848	4.82729	2.15714	38	0
201331	982.929	28.6	75.1429	16.9274	0.0634286	2.42857	56.9	0
201332	983.271	30.5429	68.7143	16.9972	0.002	2.91429	68.4	0
201333	984.943	30.2286	67	16.3256	0.0774286	3.41429	61.4	0
201334	988.929	27.6857	56	12.0666	4.67143	2.3	65.7	0
201335	988.457	25.0857	60.2857	11.4299	0.0535714	2.21429	58.4	0
201336	996.329	23.1429	61.5714	10.5931	0.0127143	1.87143	44.9	2.77778
201337	992.086	23.5714	71.4286	12.5565	4.67414	1.84286	34.3	5.26316
201338	994.471	25.3	57.2857	10.9772	4.67186	2.65714	38.9	5.55556
201339	997.257	19.0286	51.1429	7.13158	0.00242857	3.17143	40.4	0
201340	999.229	20.8429	46.7143	7.15173	4.67143	2.3	56	0
201341	996.057	22.0571	40.7143	6.63082	0	3.12857	59.2	0
201342	1006.09	13.0429	55.4286	5.63053	4.69914	2.81429	52.8	0
201343	1003.2	12.5571	46.7143	4.6221	0	2.3	59.6	1.81818
201344	1004.64	11.9571	72.5714	6.95002	0.0108571	1.6	19.6	2.17391
201345	1003.21	12.2857	49.4286	4.8191	0.0101429	2.41429	41.7	1.81818
201346	1002.63	8.9	38	3.07498	0	2.55714	55.5	1.92308
201347	1002.81	6.5	53.5714	3.78792	0.029	2.04286	33.1	2.38095
201348	1002.63	3.37143	42.2857	2.49867	0	2.27143	58.9	7.76699
201349	1000.3	6.98571	51.1429	3.71701	0	2.51429	36.9	4.34783
201350	1004.04	1.82857	41.4286	2.23717	0	2.4	52.7	9.57447
201351	1010.83	-1.38571	56.1429	2.50456	0.00171429	1.94286	31.5	22.2222
201352	1008.86	-1.37143	41	1.8306	0	2.28571	41.7	30.7018
201401	998.586	4.98571	31.7143	2.05692	0	2.34286	16.4	28.1481
201402	1008.86	0.6	61.4286	3.08529	0	2.25714	15.8	31.7757
201403	1010.14	0.557143	56	2.8055	0	2.35714	16.5	27.2727
201404	1004.23	4.12857	29	1.79038	0	3.15714	22.1	16.6667
201405	997.1	5.67143	62.7143	4.23023	1.71429	2.87143	20.1	12.3077
201406	1006.47	-2.48333	66.1429	2.76138	10.8571	2.71429	19	10
201407	1009	-0.457143	49.7143	2.34473	0	2.3	16.1	9.09091
201408	1008.63	3.97143	46.2857	2.83173	0.428571	2.47143	17.3	9.83607
201409	1004.47	7.7	52	3.93455	16.8571	2.35714	16.5	12
201410	1005.27	6.85714	40.5714	2.92733	0	3.01429	21.1	12.3288
201411	999.057	12.0429	30.4286	2.92772	0	4.5	31.5	15.3846
201412	1000.6	13.8571	32.1429	3.41165	0	3.3	23.1	2.53165
201413	992.543	18.2286	48.7143	6.51638	0	2.9	20.3	12.1622
201414	998	16.0429	32.8571	3.91865	0	3.35714	23.5	8
201415	995.957	16.8571	55.5714	6.9186	5.85714	2.64286	18.5	4.54545
201416	996.486	17.0143	61.1429	7.67539	7	2.25714	15.8	0
201417	996.186	18.3	60.1429	8.07513	28.5714	3.15714	22.1	0
201418	995.286	18.6857	39	5.34246	0.857143	3.41429	23.9	0
201419	991.2	19.6286	38	5.46582	64.8571	3.97143	27.8	0
201420	987.029	23.2571	34.5714	5.98216	0	3.4	23.8	0
201421	988.214	26.1429	45.7143	9.13259	1.85714	3.28571	23	0
201422	984.657	29.9	23.2857	5.58517	0.714286	3.45714	24.2	0
201423	985.886	24	55.2857	9.92972	31	2.77143	19.4	0
201424	986.971	25.9857	51.4286	10.1948	14.2857	2.42857	17	0
201425	985.429	22.9286	75.7143	12.8865	74.2857	1.98571	13.9	0
201426	986.371	26.8143	56.7143	11.7105	3.42857	2.14286	15	0
201427	985.657	26.3286	65.4286	13.1911	102.429	2.25714	15.8	0
201428	983.671	27.1143	62.5714	13.1113	7.14286	2.2	15.4	0
201429	987.029	29.2857	61.8571	14.4044	39.4286	2.84286	19.9	0
201430	986.143	26.2286	72.5714	14.5593	16.1429	2.94286	20.6	0
201431	984.943	27.7143	69.4286	14.981	8.57143	2.02857	14.2	0
201432	986.486	25	72.1429	13.6198	23.1429	2.17143	15.2	0
201433	987.6	25.2429	70.4286	13.4574	97	2.07143	14.5	0
201434	989.643	25.0429	72.2857	13.6759	0.571429	2.08571	14.6	0
201435	993.729	24.6286	69	12.788	23.7143	1.78571	12.5	0
201436	990.329	23.0714	71.2857	12.2204	6.14286	1.95714	13.7	0
201437	992.871	22.4	69.4286	11.5054	34.5714	1.72857	12.1	0
201438	997	18.4286	85	11.4892	58.5714	1.77143	12.4	0
201439	995.071	21.9429	75	12.1441	15.2857	1.9	13.3	0
201440	998	17.7143	68.5714	8.92966	1.14286	2.51429	17.6	0
201441	1001.76	17.8	56	7.3253	0	2.11429	14.8	4.16667
201442	1000.01	17.2857	39.1429	4.98421	9.42857	2.84286	19.9	2
201443	997.286	17.9429	64.7143	8.52861	0.285714	3.9	27.3	0
201444	1002.99	12.7714	65.2857	6.53512	3.42857	2.11429	14.8	0
201445	1003.9	10.5286	48.8571	4.32677	0	2.28571	16	0
201446	1004.5	8.42857	47	3.7045	0.285714	2.05714	14.4	2.89855
201447	1004.21	9.78571	48.4286	4.11647	1.14286	2.28571	16	7.46269
201448	1000.07	7.34286	78.8571	5.84794	31.2857	1.91429	13.4	15.942
201449	1006.69	6.34413e-17	36.1429	1.75175	0	2.28571	16	3.0303
201450	1009.61	1.37143	40.8571	2.14778	2	2.18571	15.3	14.4737
201451	1008.37	1.12857	28.7143	1.48799	0	2.88571	20.2	18.9189
201452	1006.83	2.92857	39.5714	2.27884	0	2.2	15.4	31.5068
201501	986.399	4.34286	29.4286	1.83943	0	2.64286	53	23.0769
201502	1006.01	2.54286	43.5714	2.45339	0.128571	2.04286	37.4	20.2703
201503	1008.83	2.5	46.5714	2.61575	0	2.25714	37.7	22.5
201504	1002.96	3.18571	51.7143	3.02302	0.742857	2.04286	32	17.3913
201505	1012.11	-1.6	53.2857	2.34663	0	2.02857	39.1	11.7647
201506	1010	0.457143	41.2857	2.05611	0	1.9	46.1	9.23077
201507	998.186	6.17143	45	3.12304	1.38571	2.41429	46.6	5.55556
201508	1002.44	4.35714	54.1429	3.38697	0.114286	1.78571	42.5	8.06452
201509	1002.19	4.88571	45.1429	2.91112	0	2.28571	39.8	19.1176
201510	1001.11	6.3	33.7143	2.35696	0	2.68571	55	28.125
201511	1002.94	8.15714	33.8571	2.62835	0	3.1	58	16.1765
201512	997.629	12.3857	49.4286	4.84536	0.114286	2.9	46.6	53.8462
201513	1004.96	14.7571	31.1429	3.46881	0	2.41429	67.1	21.2121
201514	990.771	11.4857	74.7143	6.97346	6.37143	2.47143	20.6	15.1515
201515	1003.99	11.0714	47.2857	4.31441	0.414286	3.17143	49.9	3.57143
201516	992.057	14.8857	53.1429	5.96003	4.55714	2.85714	49.8	0
201517	996.957	20.1857	46.7143	6.9148	0	3.04286	74.8	0
201518	990.557	20.0857	66.2857	9.76152	1.55714	2.27143	48.4	0
201519	991.643	18.1571	64.2857	8.56737	5.55714	2.71429	46.5	0
201520	986.629	21.1143	48.2857	7.49555	2.18571	3.7	66.1	0
201521	990	23.1714	41.4286	7.13786	0	2.37143	68.4	0
201522	987.086	25.2429	51.8571	9.90883	0	2.4	58.3	0
201523	986.057	27.2	41.5714	8.74755	1.62857	3.68571	57.5	0
201524	983.186	26.9571	43.8571	9.1194	2.57143	2.81429	76.7	0
201525	987.286	26.1714	51.2857	10.2601	0.557143	2.11429	52.9	0
201526	985.643	25.2857	67.1429	12.8569	3.57143	1.74286	28.6	0
201527	985.029	25.7	57.7143	11.2805	2.11429	2.3	55.7	0
201528	988.9	27.2571	62.4286	13.1731	0.785714	1.8	34.6	0
201529	984.743	27.4857	66.8571	14.2661	2.71429	1.77143	25.1	0
201530	985.1	27.4571	71.7143	15.2812	5.37143	1.68571	46.6	0
201531	984.771	29.7714	70.5714	16.8226	4.84286	2.7	48.5	0
201532	987.614	25.9	81.5714	16.1019	22.4286	1.87143	29.4	0
201533	987.7	27.5857	69.5714	14.918	2.27143	1.98571	56.7	0
201534	988.971	25.4	68.8571	13.2601	1.21429	1.87143	48.2	0
201535	989.886	23.3286	73.8571	12.826	1.07143	1.57143	41.7	0
201536	991.9	21.5714	83.8571	13.3243	13.1429	1.72857	25.2	0
201537	997.043	20.4	71	10.6259	1.65714	1.74286	41.3	0
201538	997.557	22.6857	61.8571	10.3998	0	1.9	53	0
201539	992.057	23.0429	59.2857	10.1486	0	1.87143	42	0
201540	999	21.1286	49.8571	7.74514	0.557143	2.7	42.9	0
201541	997.886	17.9	46.5714	6.12387	0.4	2.41429	55.1	0
201542	999.657	19.9714	43.4286	6.35799	0	2.32857	52.5	3.1746
201543	999.957	15.9286	72.5714	8.6029	0	1.68571	24.8	1.66667
201544	1004.7	10.8714	50.2857	4.53804	0.771429	1.84286	44.3	5
201545	1003.37	10.4286	73.5714	6.47966	5.21429	2.77143	25.6	1.42857
201546	1004.27	8.38571	87.5714	6.88577	0.942857	1.32857	11.7	0
201547	1004.24	7.34286	91.7143	6.80141	3.38571	1.95714	5.3	0
201548	1009.47	-1.6	77.2857	3.40356	1.62857	2.38571	21.7	0
201549	1005.16	2.91429	61.1429	3.51817	0	1.91429	34.2	0
201550	1006.3	4.37143	67.7143	4.23944	0	1.58571	28.7	0
201551	1009.34	1.2	45	2.34177	0	1.5	40.4	0
201552	1005.6	2.52857	63.2857	3.56047	0	2.02857	22.7	3.33333
2015053	1007.1	4.2	56	3.47156	0	2.3	35	14.5161
201601	1007.1	-0.542857	67.8571	3.18407	0.428571	1.81429	19.1	21.7391
201602	1003.73	-0.814286	48.2857	2.22922	0	2.02857	37.3	29.1667
201603	1013.36	-6.35714	49.2857	1.62102	0.685714	2.02857	35	46.0526
201604	1009.63	-1.71429	44.4286	1.94314	0	2.14286	35.7	6.75676
201605	1008.77	0.885714	33.4286	1.70761	0	2.05714	54.1	31.9444
201606	998.371	5.77143	51.7143	3.50821	4.65714	2.51429	34	6.15385
201607	1005.46	3.3	37.8571	2.22772	0	2.58571	57.5	9.23077
201608	1008.8	4.94286	47	3.04083	0	2.54286	51.7	0
201609	1000.34	11.2	39.2857	3.60983	0	2.92857	61	3.07692
201610	1004.6	5.21429	37.1429	2.44076	0	2.92857	44.3	16.3934
201611	998.3	12.5143	39.5714	3.90626	0	2.28571	50	3.27869
201612	1005.19	11.1	32.1429	2.93735	0	2.11429	64.3	1.66667
201613	995.114	17.1429	38.8571	4.91088	0	4.2	56.5	0
201614	992.986	17.3	48.5714	6.18942	0	1.9	55.7	0
201615	990.543	18.1286	50	6.65359	1.21429	2.54286	56.1	0
201616	991.871	19.9571	41.5714	6.08163	0	3.11429	55.4	0
201617	991.129	21.3571	44.4286	6.98276	0.0714286	3.24286	52.9	0
201618	989.471	21.1	46.1429	7.15769	0.671429	2.87143	53.1	0
201619	993.186	17.3429	60.8571	7.77243	5.32857	2.71429	40.1	0
201620	994.8	23.2857	36.8571	6.38684	0	2.94286	77.9	0
201621	989.257	21.5	53.8571	8.52646	0.1	1.74286	34.6	0
201622	988.557	24.1714	49.7143	9.00592	0.9	2.18571	45.1	0
201623	988.586	25.8571	53.4286	10.5243	0	2.27143	49.4	0
201624	982.629	26.4714	55.5714	11.2829	8.94286	2.72857	59.8	0
201625	985.657	26.6286	63.8571	13.0657	13.9571	2.3	57.4	0
201626	985.343	26.7286	65.5714	13.4825	5.62857	2.88571	50.6	0
201627	988.743	26.9714	68.4286	14.2386	0	1.6	22.9	0
201628	983.743	25.3857	78	15.0101	6.7	2.15714	24.3	0
201629	983	28.5286	76.7143	17.2217	20.9714	2.8	45.3	0
201630	985.286	30.6143	70.1429	17.4099	0.642857	2.21429	53.3	0
201631	988.757	26.2571	86.8571	17.4499	28.4	1.24286	16.3	0
201632	987.486	29.0714	77.5714	17.8778	4.67143	1.57143	38.4	0
201633	985.829	25.1571	89	16.9339	22.7429	1.97143	12.9	0
201634	990.814	25.0143	66.1429	12.4959	4.34286	2.1	62.7	0
201635	985.586	25.2714	52	9.95022	0	1.98571	64	0
201636	990.214	24.6286	64.7143	11.9937	0.242857	1.82857	49.8	0
201637	996.3	23.8286	65	11.5747	0.0428571	1.8	40.3	0
201638	996.629	22.8143	50.7143	8.5819	0	2.47143	51	0
201639	996.9	20.3857	61.1429	9.14399	0.1	2.34286	31.6	0
201640	998.529	19.3286	60.7143	8.59873	0.628571	1.85714	37.7	0
201641	1001.46	17.7857	59.7143	7.80534	1.5	2.08571	35.1	0
201642	998.829	16	82	9.75744	2.38571	1.82857	20.3	0
201643	1003.2	11.5857	71	6.6631	2.3	2.27143	22.3	3.33333
201644	1002.96	10.6429	65.2857	5.81816	0.557143	2.32857	35.4	0
201645	1002.7	10.1429	67.1429	5.82101	1.28571	2.45714	42.4	1.66667
201646	999.9	11.2286	63	5.79793	0.5	1.71429	20.9	5
201647	1008.19	1.98571	52.5714	2.86519	1.41429	2.22857	34.2	3.33333
201648	1006.86	7.3	50	3.69899	0	2.08571	41.8	10
201649	1003.73	5.11429	52.1429	3.40689	0	2.75714	38.2	6.66667
201650	1006.44	3.74286	57.8571	3.49318	0.0285714	2.9	35.8	20
201651	1006.17	2.31429	78.1429	4.34161	1.21429	1.04286	12.5	30
201652	1010.77	-0.166667	73.5	3.52716	0.9	1.66667	31.6167	40
